# The endometrium in stimulated cycles for IVF

Claire Bourgain<sup>1,3</sup> and Paul Devroey<sup>2</sup>

<sup>1</sup>Department of Pathology and <sup>2</sup>Centre for Reproductive Medicine, University Hospital, Dutch-speaking Brussels Free University (Vrije Universiteit Brussel), Laarbeeklaan 101, 1090 Brussels, Belgium

<sup>3</sup>To whom correspondence should be addressed. E-mail: Claire.Bourgain@az.vub.ac.be

Ovarian stimulation for IVF is known to affect luteal phase function. The endometrium in IVF cycles is thus subject to an altered endocrinological environment and to a possible direct effect of the ovarian stimulation therapy. Factors influencing the endometrial receptivity in such cycles are poorly understood. Studies comparing the endometrium in IVF cycles with natural cycles as controls have shown premature secretory changes in the post-ovulatory and early luteal phase of IVF cycles, followed by a large proportion of dyssynchronous glandular and stromal differentiation in the mid-luteal phase. These findings suggest a profound modification of luteal endometrial development in stimulated cycles. This hypothesis is further supported by the demonstration of a modified endometrial steroid receptor regulation and a profound antiproliferative effect in IVF cycles. The time of maximal endometrial receptivity is defined as the implantation window and is characterized by the expression of various endometrial products, among which pinopodes, integrins and leukaemia inhibitory factor are best described. Premature expression of pinopodes and integrins are in line with the observation of precocious luteal transformation following ovarian stimulation, although the clinical relevance with respect to the establishment of a clinical pregnancy awaits further validation. Studies exploring the endometrium within the cycle of embryo transfer have shown a deleterious effect of severe peri-ovulatory maturation advancement exceeding 3 days, as no clinical pregnancies were obtained in this condition. Further unravelling of molecules involved in the implantation mechanism is needed for a better comprehension of the link between altered endometrial development and receptivity in IVF cycles.

**Key words:** endometrial receptivity/endometrium/IVF/luteal phase/ovarian stimulation

## Introduction

Medical treatment for infertility has increased in recent years, and it is estimated that 1.33% of live births issue from assisted reproductive technologies including IVF and ICSI (Nygren and Anderson, 2001).

Arguments in favour of an affected endometrial environment are supported by a reduced implantation rate observed in IVF cycles as compared to natural cycles (review by Macklon and Fauser, 2000). This hypothesis is strengthened by the finding of a lower pregnancy outcome from a shared pool of oocytes in oocyte donors as compared to recipients in human (Check *et al.*, 1992) and animal experiments (Ertzeid and Storeng, 2001). For human data, however, controversy regarding this issue persists, as, in a large retrospective analysis, implantation rates were similar in donor and recipient IVF patients (Levi *et al.*, 2001).

In a model to calculate the probability of implantation in IVF cycles (Rogers *et al.*, 1986), it has been assumed that a receptive endometrial environment accounted between 0.31 and 0.64 for the probability of successful implantation.

The assessment of endometrial function in terms of receptivity in IVF cycles is, however, a highly controversial area, as to date no

unequivocal marker of receptivity has been defined even in natural cycle endometrium. IVF treatment is generally achieved through high-dose gonadotrophin ovarian stimulation and is thus associated with supraphysiological serum concentrations of estradiol (E<sub>2</sub>) and progesterone. It is obvious that these high steroid concentrations may have an influence on endometrial development. Furthermore, a direct effect of the ovulation stimulation drugs and luteal phase support therapies can be responsible for an altered endometrial environment.

## Endometrial histological maturation in IVF cycles

The histological changes that an endometrium undergoes during a natural menstrual cycle were described more than 50 years ago (Noyes *et al.*, 1950). Dating yields several methodological flaws (only infertile patients were included in Noyes' criteria), is subject to intra- and inter-observer variability (Smith *et al.*, 1995) and shows questionable relationship to endometrial receptivity (Murray *et al.*, 2002). Interpretation is rendered even more difficult in the case of glandular–stromal dyssynchrony, where glandular and stromal maturation do not match the same cycle day

**Table I.** Endometrial morphology and morphometry in GnRH agonist and gonadotrophin stimulated cycles, classified according to biopsy timing

| Author                        | Stimulation protocol                              | Luteal support                                  | Biopsies      | Timing                                      | Dating results                               |
|-------------------------------|---------------------------------------------------|-------------------------------------------------|---------------|---------------------------------------------|----------------------------------------------|
| Marchini <i>et al.</i> (1991) | Buserelin/hMG                                     | None                                            | 21 stimulated | Pre-ovulatory:<br>E <sub>2</sub> >250 pg/ml | 21 early secretory                           |
|                               | Natural cycle controls                            |                                                 | 20 controls   | Follicle >17 mm                             | 18 proliferative<br>2 secretory              |
| Ubaldi <i>et al.</i> (1997)   | Buserelin/hMG                                     | Vaginal progesterone                            | 41 stimulated | Oocyte retrieval                            | 39 advanced<br>2 in phase                    |
| Lass <i>et al.</i> (1998)     | Buserelin or nafarelin/<br>FSH or recombinant FSH | Not mentioned                                   | 33 stimulated | Oocyte retrieval                            | 15 in phase<br><br>15 advanced<br>3 delayed  |
|                               |                                                   |                                                 |               |                                             | 11 stroma advanced                           |
| Noci <i>et al.</i> (1997)     | Buserelin s.c./FSH                                | None                                            | 12 stimulated | Oocyte retrieval +2                         | 25 normal day 16–17 aspect                   |
| Barash <i>et al.</i> (1992)   | Buserelin/hMG                                     | Not mentioned                                   | 20 stimulated | Oocyte retrieval +7 2 h                     | 2 atrophy                                    |
|                               | Contraceptive/gonadotrophin<br>hMG                |                                                 | 5 stimulated  |                                             |                                              |
| Macrow <i>et al.</i> (1994)   | Goserelin/hMG                                     | None                                            | 2 controls    | Oocyte retrieval +4                         | No difference compared<br>to controls        |
|                               |                                                   |                                                 | 11 stimulated |                                             |                                              |
| Ragni <i>et al.</i> (1999)    | Natural cycle controls                            | 15 vaginal progesterone<br>15 i.m. progesterone | 11 controls   | Ovulation +4                                |                                              |
|                               | Decapeptyl/FSH                                    |                                                 | 30 stimulated | hCG +6                                      | 30 in phase                                  |
| Seif <i>et al.</i> (1992)     | Buserelin s.c./hMG                                | 15 None                                         | 30 stimulated | hCG +7                                      | 5 inadequate samples                         |
|                               |                                                   | 15 hCG 1×                                       |               |                                             | 3 gland delay                                |
| Bourgain <i>et al.</i> (1994) | Buserelin s.c./hMG                                | 10 None                                         | 51 stimulated | hCG +7                                      | 14 advanced stroma                           |
|                               |                                                   | 41 hCG                                          |               |                                             | Non-supplemented cycles:<br>70% out of phase |
|                               |                                                   | 28 vaginal progesterone<br>12 i.m. progesterone |               |                                             | Supplemented cycles:<br>80% out of phase     |
| Kolb and Paulson (1997)       | Leuprolide/FSH                                    | None                                            | 7 stimulated  | hCG +7                                      | 1.8 days advanced compared<br>to controls    |
| Basir <i>et al.</i> (2001)    | HRT cycle controls                                | Not mentioned                                   | 20 controls   | 7 days progesterone                         |                                              |
|                               | Buserelin/hMG                                     |                                                 | 26 stimulated | hCG +7                                      | 15 gland–stroma dyssynchrony                 |
| Meyer <i>et al.</i> (1999)    | Natural cycle controls                            | 9 none                                          | 12 controls   | LH +7                                       | 11 gland–stroma synchrony                    |
|                               |                                                   |                                                 |               |                                             | 12 in phase glands                           |
| Meyer <i>et al.</i> (1999)    | Leuprolide/FSH                                    | 11 i.m. progesterone                            | 20 stimulated | hCG +8                                      | 1 advanced, 12 dyssynchrony,<br>7 normal     |
|                               | Natural cycle controls                            |                                                 | 20 controls   | LH+8                                        | 3 advanced, 5 dyssynchrony,<br>12 normal     |
| Balasch <i>et al.</i> (1991)  | Buserelin/hMG                                     | 21 hCG                                          | 21 stimulated | hCG+11–13                                   | 19 normal                                    |
|                               |                                                   |                                                 |               |                                             | 2 deficient                                  |

(Deligdisch, 2000). Despite these limitations, no other method has proven yet to be more efficient than dating to estimate endometrial development. Dating accuracy can be improved by applying strict criteria to determine the chronological cycle day by taking the day of LH surge as reference point (Acosta, 2000) and biopsy timing (Castelbaum *et al.*, 1994).

In IVF cycles, the day of oocyte retrieval is generally designated as equivalent to day 14 in a natural cycle (Develioglou *et al.*, 1999; Creus *et al.*, 2003).

Early studies using IVF protocols with clomiphene citrate or gonadotrophins already indicated an adverse effect of ovarian stimulation on endometrial development (Garcia *et al.*, 1984; Sterzik *et al.*, 1988; Rogers *et al.*, 1991). Nowadays, most ovarian stimulation protocols include co-treatment with GnRH analogues adjunct to gonadotrophins for prevention of a premature LH rise. Most data on the endometrial histology have been reported in GnRH agonist and gonadotrophin stimulation protocols (Ben-Nun *et al.*, 1992; Seppala and Tiitinen, 1995; Deligdisch, 2000;

Tavaniotou *et al.*, 2001). In those studies, the morphological aspect of the endometrium was related to that expected from the chronological equivalent in a natural cycle and dated according to Noyes' criteria or by morphometric assessment. The day of oocyte retrieval was either considered to be equivalent to day 14 in a natural 28 day cycle, or the ovulatory stimulus was considered equivalent to the natural cycle LH surge. Results from these studies varied according to the timing of the endometrial biopsy (Table I).

The only study performing biopsies in the pre-ovulatory phase showed accentuated proliferative aspects and early secretory changes, even before any serum progesterone rise was observed (Marchini *et al.*, 1991).

In the peri-ovulatory phase, a generally advanced endometrial maturation was observed. On the day of oocyte retrieval, an advancement of 2–4 days was reported in 100% (Ubaldi *et al.*, 1997) and 45.5% (Lass *et al.*, 1998) of cycles. The different percentages can partially be explained by patient selection. In the

first study, only women without known endometrial pathology attending ICSI cycles were included, while the latter study concerned observations in women with endometrial polyps.

On day 2 following oocyte retrieval, discordant stromal maturation with precocious edema and vascular hypertrophy was reported in 91% of biopsies (Noci *et al.*, 1997). On this cycle day, other studies found in-phase maturation compared to the chronological cycle day and no statistical difference between stimulated and natural cycles (Bourgain *et al.*, 2002; Tavaniotou *et al.*, 2003).

In the early to mid-luteal phase, 72 h and 4 days after oocyte retrieval respectively, glandular development was also similar in stimulated cycles compared to natural controls (Barash *et al.*, 1992; Macrow *et al.*, 1994).

Mid-luteal biopsies frequently showed a glandular–stromal dyssynchrony with a glandular delay (Seif *et al.*, 1992; Meyer *et al.*, 1999; Basir *et al.*, 2001). In cycles where a luteal support with either hCG or i.m. or vaginal progesterone was used, normal ‘in phase’ histology was reported and no differences were seen related to the luteal support administration route (Bourgain *et al.*, 1994; Ragni *et al.*, 1999). One report mentioned advanced endometrial maturation in the absence of luteal support on day hCG +7 (Kolb and Paulson, 1997). All the patients from that study, however, presented premature elevation of serum progesterone on the day of hCG injection.

In the late luteal phase, on days 11–13 after hCG injection, normal endometrial development was found (Balasch *et al.*, 1991).

Data on the endometrial morphology in cycles using GnRH antagonists adjunct to gonadotrophins are much scarcer. Comparing biopsies in agonist and antagonist cycles on the day of oocyte retrieval showed a similar endometrial advancement of 2–4 days (Kolibianakis *et al.*, 2002). In the mid-luteal phase, in comparison to agonist cycles, preliminary data show less endometrial delay in antagonist cycles without luteal phase support (Kolibianakis *et al.*, 2003b).

The results of the different published studies are difficult to compare. Stimulation regimens in terms of the type of agonist and administration route were different. A luteal support therapy was not always present and not similar in the different studies. The methods of endometrial biopsy analysis varied from simple dating methods to complex morphometrical analysis, with a large inter-study variation both for the different endometrial parameters assessed as for the application of dating criteria. Patient selection criteria and endocrinological parameters were also highly variable.

Despite the aforementioned considerations, a general trend emerges from these studies. In the peri- and post-ovulatory period, an advanced maturation of the endometrium is present, followed by a ‘normal’ aspect of the endometrium in the early luteal phase and resulting in frequent glandular–stromal dyssynchrony in the mid- and late luteal phase (Figure 1). The observations in GnRH agonist cycles lend support to the clinical need for luteal supplementation in these cycles (Pritts and Atwood, 2002), as all types of luteal support corrected mid-luteal glandular delay.

These findings are supported by results from studies evaluating the endometrial proliferation index in stimulated cycles. Early luteal severe antiproliferative effects of the stimulation protocol were observed in both glandular and stromal cells when compared to natural cycle controls (Bourgain *et al.*, 2002). This difference was no longer present on later cycle days (Bebington *et al.*, 2000).

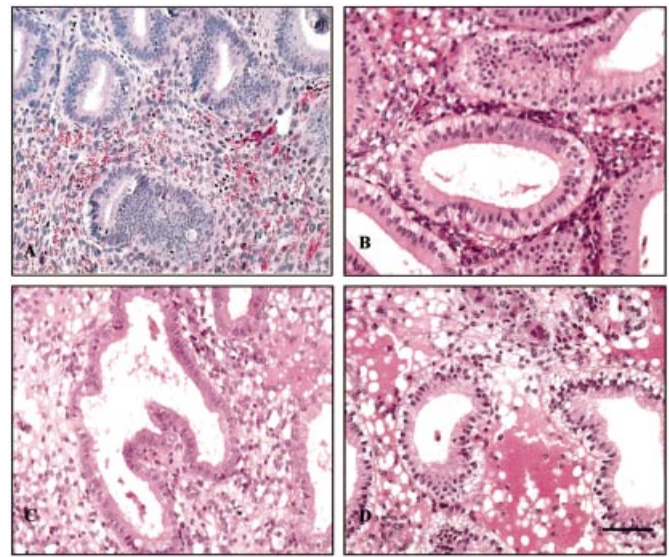

**Figure 1.** Histological maturation in natural and stimulated cycles. Light microscopy of the endometrium on luteal phase day 0 (A, B) and day 7 (C, D) of the luteal phase in natural (A, C) and stimulated (B, D) cycles. On the day of natural ovulation, a pseudostratified epithelium without vacuoles is seen (A). On the day of oocyte retrieval, the glandular cells show subnuclear vacuolization and very few mitotic figures (B). On day 7, stimulated endometria show glandular–stromal dyssynchrony with persistent vacuoles in the glands (D). Scale bar = 100  $\mu$ m.

The particular endometrial development in IVF cycles is most likely due to several factors. An early and increased exposure to progesterone of the endometrium in stimulated cycles may explain both early secretory transformation (Fanchin *et al.*, 1995) and subsequent mid-luteal glandular maturation arrest (Ezra *et al.*, 1994). Elevated serum E<sub>2</sub> concentrations in stimulated cycles have also been associated with more frequent glandular–stromal dyssynchrony (Basir *et al.*, 2001). HCG injection to achieve final oocyte maturation is a further possible cause for disrupted endometrial luteal phase morphology. Indeed, a direct effect of hCG in terms of advanced endometrial maturation and acquisition of a luteal phase phenotype has been well documented in both *in vitro* experiments (Tang and Gurpide, 1993; Han *et al.*, 1999) and hormone replacement cycles (Fanchin *et al.*, 2001). Finally, it has been demonstrated that GnRH and its agonists have antiproliferative effects on the endometrium (Kim *et al.*, 1999; Meresman *et al.*, 2002). The hypothesis of multiple factors regulating endometrial development in IVF cycles is sustained by the finding of a large variability of endometrial patterns for similar hormone values (Bourgain *et al.*, 1994; Seppala and Tiitinen, 1995) and the absence of a clear correlation between individual serum hormone measurements and endometrial dating (Ubaldo *et al.*, 1997).

### Endometrial steroid receptors in stimulated cycles

Early reports evaluating the endometrial steroid receptor content have used homogenized endometrial samples not permitting differentiation of the receptors in glandular and stromal cells. Compared to natural cycles, luteal cytosolic receptors were reduced in stimulated cycles when assessed with a dextran

charcoal assay (Forman *et al.*, 1989; Molina *et al.*, 1989). Other studies found cytosolic reduction of estrogen receptors (ER) but not of progesterone receptors (PR) in correlation with high ovarian response (Toner *et al.*, 1991). Using enzyme immunoassays, no receptor difference between natural and stimulated cycles was seen (Balasch *et al.*, 1992).

More recent studies evaluated the receptor status by immunohistochemical techniques. These techniques allow for differentiation between glandular and stromal cell receptor expression. Newly available monoclonal antibodies against the different receptor isoforms have further permitted more detailed insight in the endometrial hormonal regulation (Lecce *et al.*, 2001; Mote *et al.*, 2001). The comparison of literature data should, however, be made with caution. The different monoclonal antibodies and tissue processing methods are known to result in variable immunohistochemical staining patterns (Mote *et al.*, 2001). Moreover, wide variation exists throughout the studies regarding the methods reporting the staining intensity.

In stimulated cycles, both glandular and stromal PR are found to be reduced in the peri-ovulatory and luteal phase. Data on endometrial estrogen receptors in stimulated cycles are less clear since both overall decrease and glandular ER increase has been described. On day 2 after oocyte retrieval, low overall PR associated with either high or reduced glandular ER were found (Noci *et al.*, 1997; Bourgain *et al.*, 2002). Hadi *et al.* (1994) found a reduction in PR in the endometrium after ovulation induction compared to natural cycle controls on day 4 of the luteal phase, which was not associated with detectable morphological changes. A decreased amount of both glandular and stromal ER and PR was seen throughout the luteal phase in stimulated cycles (Develioglou *et al.*, 1999). Lower glandular and stromal mid-luteal PR expression was found in supplemented than in non-supplemented cycles (Bourgain *et al.*, 1994). Other studies showed few or no difference in steroid receptors between natural and stimulated cycles on various luteal phase cycle days, but observed a differential regulation of progesterone-related molecules such as growth factors and ubiquitin in natural and stimulated cycles (Salat-Baroux *et al.*, 1994; Bebington *et al.*, 2000).

The results of these studies further support the notion of a substantially modified endometrial environment in stimulated as compared to natural cycles.

### Markers of the implantation window in stimulated cycles

The implantation window is defined as the limited period during which the uterus is receptive for implantation of the free-lying blastocyst. Clinical evidence for an endometrial 'implantation window' has been demonstrated (Navot *et al.*, 1991; Wilcox *et al.*, 1999). It is suggested that in the human natural cycle, blastocyst apposition begins about day LH +6 and is completed by day LH +10 (Lessey, 2000).

During the receptive phase, the endometrium secretes proteins in a temporary fashion that will be recognized by the embryo and facilitate its growth and differentiation (Lessey, 2000). The most cited factors involved in implantation include the formation of luminal epithelial 'pinopodes', expression of adhesion molecules and of cytokines.

Pinopodes were described originally in rats and mice as epithelial projections with pinocytic activity (Enders and Nelson,

1973). The structures that have been currently described by scanning electron microscopy as 'pinopodes' in human endometrium, however, show important morphological and functional differences compared to their rodent counterpart (Murphy, 2000; Adams *et al.*, 2001). In normally fertile women, pinopode formation and regression is closely related to serum progesterone concentrations as well as to the down-regulation of the progesterone receptor B in glandular and luminal cells (Stavreus-Evers *et al.*, 2001). Pinopodes were demonstrated at the apical surface of the luminal epithelial cell during the implantation window (day 20–22) (Nikas *et al.*, 1999), therefore claimed strongly as a possible receptivity marker. Recent studies have questioned this assumption, as pinopode appearance varied up to 5 days between women and a direct involvement of these structures in embryo attachment was not found (Bentin-Ley, 2000). Their synchrony with other presumed markers of implantation has also been debated (Acosta, 2000; Creus *et al.*, 2003).

In early reports on CC and hMG/hCG schemes for ovarian stimulation, endometrial pinopodes were found to be diminished or absent (Martel *et al.*, 1987). In GnRH agonist and gonadotrophin stimulation, an early appearance of 1–2 days prior to the expected cycle day and a wider range of cycle days displaying endometrial pinopodes has been reported as compared to natural cycles (Develioglou *et al.*, 1999; Nikas *et al.*, 1999; Novotny *et al.*, 1999). These observations led to the hypothesis of a possible shift in the implantation window in IVF cycles. However, a recent study assessing natural and stimulated cycles within the same patient found no difference in pinopode expression (Creus *et al.*, 2003).

Integrins are cell surface adhesion molecules involved in a wide variety of cellular processes (Hii and Rogers, 1998). Three integrins ( $\alpha_1\beta_1$ ,  $\alpha_4\beta_1$  and  $\alpha_v\beta_3$ ) are thought to be important for endometrial receptivity, as they are expressed in the implantation window (Lessey *et al.*, 1996). Their exact role remains controversial (Creus *et al.*, 1998). In IVF cycles (Table II), premature expression of  $\alpha_1$  and  $\alpha_4$  integrin subunits has been found on day 2 following oocyte retrieval, consistent with advanced secretory transformation (Tavaniotou *et al.*, 2003). In the mid-luteal phase, variable results were reported. Ovarian stimulation induced either lower (Meyer *et al.*, 1999; Thomas *et al.*, 2002), similar (Wang *et al.*, 2000; C.Bourgain *et al.*, unpublished data) or higher integrin expression (Creus *et al.*, 2003).

Overall,  $\alpha_v\beta_3$  integrin expression correlated well with endometrial maturation (Figure 2). In the studies reporting a lower expression, stimulated cycles from oocyte donors were assessed, where luteal support was not systematically provided. In those cycles, the lowered glandular integrin expression correlated with a morphological delay in glandular maturation. In endometria with more advanced glandular development, integrin expression was also found at a higher level.

### Leukaemia inhibitory factor

Leukaemia inhibitory factor (LIF) is a pleiotrophic cytokine from the gp130 family. LIF is the first cytokine that appeared to be critically involved in embryonic development and implantation, as female mice without functional LIF gene fail to implant, although their blastocysts can be successfully transplanted into wild-type recipient females (Stewart *et al.*, 1992). In the human, cyclic endometrial LIF expression patterns (Laird *et al.*, 1997; Tsai *et al.*,

**Table II.** Integrin expression in stimulated cycles classified according to biopsy timing

| Author                          | Cycles                    | Biopsies      | Integrins                                                           | Timing                                            | Results                                                                                                                                                                                                                                                |
|---------------------------------|---------------------------|---------------|---------------------------------------------------------------------|---------------------------------------------------|--------------------------------------------------------------------------------------------------------------------------------------------------------------------------------------------------------------------------------------------------------|
| Tavaniotou <i>et al.</i> (2003) | Buserelin/recombinant FSH | 7 stimulated  | $\alpha_1$                                                          | Oocyte retrieval +2                               | Higher and more frequent integrin expression in stimulated cycles                                                                                                                                                                                      |
| Thomas <i>et al.</i> (2002)     | Natural cycle controls    | 23 controls   | $\alpha_4$ , $\alpha_v\beta_3$                                      | Ovulation +2                                      | Decrease of $\alpha_v\beta_3$ , $\alpha_4\beta_1$ and $\alpha_1\beta_1$ in glandular epithelium of stimulated cycles<br>Decrease of $\alpha_v\beta_3$ in luminal epithelium of stimulated cycles<br>Decreased integrin expression in stimulated cycles |
|                                 | Synarel/recombinant FSH   | 15 stimulated | $\alpha_v\beta_3$ , $\alpha_1$ , $\alpha_4$ , $\beta_1$ , $\beta_3$ | hCG +7                                            |                                                                                                                                                                                                                                                        |
|                                 | Natural cycle controls    | 15 controls   |                                                                     | LH surge +7                                       |                                                                                                                                                                                                                                                        |
| Meyer <i>et al.</i> (1999)      | Leuprolide/FSH            | 20 stimulated | $\alpha_v\beta_3$                                                   | hCG +8                                            | Increased integrin expression in stimulated cycles                                                                                                                                                                                                     |
|                                 | Natural cycle controls    | 20 controls   |                                                                     | LH surge +8                                       |                                                                                                                                                                                                                                                        |
| Creus <i>et al.</i> (2003)      | Triptorelin/FSH           | 8 stimulated  | $\alpha_v\beta_3$                                                   | Oocyte retrieval +7–8/<br>oocyte retrieval +11–12 |                                                                                                                                                                                                                                                        |
|                                 | Natural cycle controls    | 8 controls    |                                                                     | Ovulation +7–8/<br>ovulation +11–12               |                                                                                                                                                                                                                                                        |

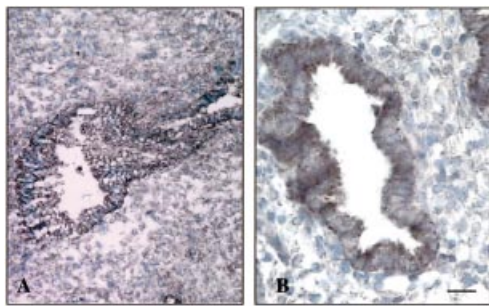

**Figure 2.** Immunohistochemical staining for  $\alpha_v\beta_3$  integrin (A) and leukemia inhibitory factor (LIF) (B) on day 7 of the luteal phase in a stimulated cycle. The glandular epithelium shows membranous staining for integrin, and intense basal and apical cytoplasmic staining for LIF. Scale bar = 100  $\mu$ m.

2000) and clinical association between LIF deficiency and infertility (Hambartsoumian, 1998; Giess *et al.*, 1999) also suggest an important function in implantation.

In IVF cycles, there are few data on LIF regulation. One study reported higher LIF expression on cycle day 10 compared to day 20 in endometrial explants from patients in a simulated menstrual cycle (Hambartsoumian *et al.*, 1998) but the effect of the *in vitro* culture system on LIF expression cannot be excluded in this type of study. Higher LIF expression was found on day 7 of the luteal phase in HRT and stimulated cycles compared to natural cycle controls (Figure 2) (Ledee-Bataille *et al.*, 2002; C.Bourgain *et al.*, unpublished data). The exact importance of LIF in IVF cycles awaits further investigation.

### Endometrial development in IVF cycles with embryo transfer

In an attempt to correlate endometrial development and the establishment of an ongoing pregnancy, an endometrial biopsy was performed on the day of oocyte retrieval within the actual embryo transfer cycle (Ubaldi *et al.*, 1997; Kolibianakis *et al.*, 2002). In IVF cycles with either GnRH agonists or antagonists, no deleterious effect of the endometrial biopsy on clinical pregnancy was recorded.

As illustrated in the aforementioned studies, virtually all endometria on the day of oocyte retrieval in both stimulation regimens showed advancement of  $\geq 2$  days as compared to a natural cycle endometrium on the day of ovulation.

This advancement was more pronounced in cycles with premature serum progesterone rise on or before the day of hCG injection, but for an individual patient, no correlation could be found between endometrial secretory development and absolute progesterone values or number of days of premature progesterone elevation (Ubaldi *et al.*, 1997).

Using multiple regression analysis in GnRH antagonist cycles, the degree of endometrial advancement could be predicted by high LH concentration at initiation of recombinant (r)FSH stimulation and long duration of rFSH stimulation before antagonist inhibition (Kolibianakis *et al.*, 2002). This correlation was not present in GnRH agonist cycles, where low serum LH concentrations are observed as a result of pituitary desensitization.

Endometrial morphological features of precocious secretory transformation in both stimulation regimens included appearance of uniform glandular subnucleolar vacuoles displacing the nucleus (Figure 1). These histological parameters were associated with a decreased proliferation index and PR content in both glands and stroma (Bourgain *et al.*, 2002).

Only a minority of endometria (7/39 in GnRH-agonist and 6/55 in GnRH antagonist cycles) presented extreme endometrial advancement of  $>3$  days as compared to a natural cycle ovulation day (Ubaldi *et al.*, 1997; Kolibianakis *et al.*, 2002) (Figure 3). In these biopsies, glandular vacuoles were present also at the luminal cell pole, mitosis were absent from glands and stroma and a variable stromal edema was present. In a natural cycle, these features are not expected prior to days 4–5 of the luteal phase. Although no cross-over studies are available with natural cycle endometria on luteal cycle days 4 and 5, glands in these IVF cycles appeared less tortuous and contained less intraluminal secretion as described in Noyes' criteria for these cycle days.

The accuracy and inter-observer reproducibility of endometrial dating has been subject to debate, but were reported to be very high for overall dating (proliferative versus secretory) and reasonable to high for individual post-ovulatory days providing a dating error allowance of 1 day (Duggan *et al.*, 2001). In our hands, including both Noyes' criteria and a semiquantitative method taking serum



LH surge as reference day (Li *et al.*, 1988), inter- and intra-observer variability was <5%.

Implantation correlated negatively with important endometrial maturation advancement of >3 days on the day of oocyte retrieval, as no pregnancies were observed in such cycles. Taking into account that severe endometrial advancement was found to be associated with high follicular LH concentrations (Kolibianakis *et al.*, 2002), further support for a deleterious effect of extreme advancement was provided from a recent clinical study in 111 patients stimulated with GnRH agonists and recombinant FSH. Indeed, in these patients, high early follicular phase LH and E<sub>2</sub> was also associated with reduced pregnancy rate (Kolibianakis *et al.*, 2003a).

On the day of oocyte retrieval, no other endometrial marker was related to clinical pregnancy outcome (Table III) (Bourgain *et al.*, 2002). These findings are in line with recent observations on LIF secretion on the day of oocyte retrieval in IVF cycles with embryo transfer, where LIF expression as assessed by endometrial flushing was also not different in pregnant and non-pregnant women (Olivennes *et al.*, 2003).

The observations in stimulated cycles with embryo transfer suggest that altered endometrial development as a result of IVF therapy has probably less impact than initially thought on the

actual endometrial receptivity. Alternatively, good embryo quality may to a certain extent compensate for less optimal endometrial development. These findings lend support to the presumed multiple and redundant pathways regulating implantation events.

## Conclusions

There is strong evidence from histological observations and expression of implantation window markers that ovarian stimulation for IVF profoundly alters the luteal phase endometrial development. From studies in IVF cycles with embryo transfer, only extremely deviant endometrial morphology seems to affect receptivity for implantation. Further unravelling of molecules involved in the implantation mechanism is needed for a better comprehension of the link between altered endometrial development and receptivity in IVF cycles.

## References

- Acosta, A.A. (2000) Endometrial dating and determination of the window of implantation in healthy fertile women. *Fertil. Steril.*, **73**, 788–798.
- Adams, S.M., Gayer, N., Terry, V. and Murphy, C.R. (2001) Manipulation of the follicular phase: uterodomes and pregnancy—is there a correlation? *BMC Pregnancy Childbirth*, **1**, 2.
- Balasch, J., Jove, I., Marquez, M., and Vanrell, J.A. (1991) Hormonal and histological evaluation of the luteal phase after combined GnRH-agonist/ gonadotrophin treatment for superovulation and luteal phase support in in-vitro fertilization. *Hum. Reprod.*, **6**, 914–917.
- Balasch, J., Rivera, F., Jove, I.C. and Vanrell, J.A. (1992) Monoclonal enzyme immunoassay measurement of estradiol and progesterone receptors in in vitro fertilization and spontaneous cycles. *Eur. J. Obstet. Gynecol. Reprod. Biol.*, **45**, 113–117.
- Barash, A., Czernobilsky, B., Insler, V., Borenstein, R., Rosenberg, M. and Fink, A. (1992) Endometrial morphology and hormonal profiles in in vitro fertilization patients. *Eur. J. Obstet. Gynecol. Reprod. Biol.*, **44**, 117–121.
- Basir, G.S., O, W.S., Ng, E.H. and Ho, P.C. (2001) Morphometric analysis of peri-implantation endometrium in patients having excessively high oestradiol concentrations after ovarian stimulation. *Hum. Reprod.*, **16**, 435–440.
- Bebington, C., Doherty, F.J., Ndukwe, G. and Fleming, S.D. (2000) The progesterone receptor and ubiquitin are differentially regulated within the endometrial glands of the natural and stimulated cycle. *Mol. Hum. Reprod.*, **6**, 264–268.
- Ben-Nun, I., Jaffe, R., Feigin, M.D. and Beyth, Y. (1992) Therapeutic maturation of endometrium in in vitro fertilization and embryo transfer. *Fertil. Steril.*, **57**, 953–962.
- Bentin-Ley, U. (2000) Relevance of endometrial pinopodes for human blastocyst implantation. *Hum. Reprod.*, **6** (Suppl.), 67–73.
- Bourgain, C., Smits, J., Camus, M., Erard, P., Devroey, P., Van Steirteghem, A.C. and Kloppel, G. (1994) Human endometrial maturation is markedly improved after luteal supplementation of gonadotrophin-releasing

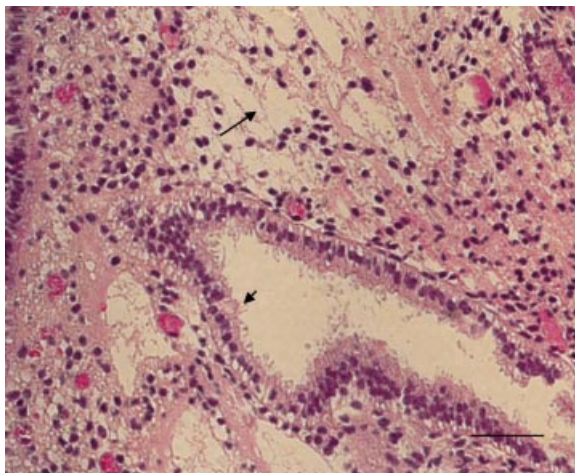

**Figure 3.** Histological aspect of extremely advanced endometrial development on the day of oocyte retrieval. The glandular cells show apical secretion (short arrow) and absent mitotic figures. The stroma contains large amounts of edema (long arrow). Scale bar = 100  $\mu$ m.

**Table III.** Endometrial morphology, proliferation and hormone receptors and clinical pregnancy

|                                                  | Cell type | Pregnant     | Not pregnant | P       |
|--------------------------------------------------|-----------|--------------|--------------|---------|
| Histological dating (days post oocyte retrieval) |           | 2.18 (0.22)  | 2.86 (0.15)  | < 0.039 |
| Proliferation index (positive cells/1000 cells)  | Glandular | 28.27 (6.9)  | 34.88 (8.5)  | NS      |
|                                                  | Stromal   | 33.72 (8.32) | 26.86 (5.96) | NS      |
| Estrogen receptor (mean H-score/1000 cells)      | Glandular | 0.84 (0.1)   | 0.85 (0.07)  | NS      |
|                                                  | Stromal   | 0.16 (0.03)  | 0.13 (0.02)  | NS      |
| Progesterone receptor (mean H-score/1000 cells)  | Glandular | 2.34 (0.04)  | 2.26 (0.05)  | NS      |
|                                                  | Stromal   | 1.78 (0.05)  | 1.68 (0.05)  | NS      |

Data are represented as mean (SEM).  
NS = non-significant.

- hormone analogue/human menopausal gonadotrophin stimulated cycles. *Hum. Reprod.*, **9**, 32–40.
- Bourgain, C., Ubaldi, F., Tavaniotou, A., Smitz, J., Van Steirteghem, A.C. and Devroey, P. (2002) Endometrial hormone receptors and proliferation index in the periovulatory phase of stimulated embryo transfer cycles in comparison with natural cycles and relation to clinical pregnancy outcome. *Fertil. Steril.*, **78**, 237–244.
- Castelbaum, A.J., Wheeler, J., Coutifaris, C.B., Mastroianni, L. Jr and Lessey, B.A. (1994) Timing of the endometrial biopsy may be critical for the accurate diagnosis of luteal phase deficiency. *Fertil. Steril.*, **61**, 443–447.
- Check, J.H., Nowroozi, K., Chase, J., Nazari, A. and Braithwaite, C. (1992) Comparison of pregnancy rates following in vitro fertilization–embryo transfer between the donors and the recipients in a donor oocyte program. *J. Assist. Reprod. Genet.*, **9**, 248–250.
- Creus, M., Balasch, J., Ordi, J., Fabregues, F., Casamitjana, R., Quinto, L., Coutifaris, C. and Vanrell, J.A. (1998) Integrin expression in normal and out-of-phase endometria. *Hum. Reprod.*, **13**, 3460–3468.
- Creus, M., Ordi, J., Fabregues, F., Casamitjana, R., Carmona, F., Cardesa, A., Vanrell, J. and Balasch, J. (2003) The effect of different hormone therapies on integrin expression and pinopode formation in the human endometrium: a controlled study. *Hum. Reprod.*, **18**, 683–693.
- Deligdisch, L. (2000) Hormonal pathology of the endometrium. *Mod. Pathol.*, **13**, 285–294.
- Develioglou, O.H., Hsiu, J.G., Nikas, G., Toner, J.P., Oehninger, S. and Jones, H.W. Jr (1999) Endometrial estrogen and progesterone receptor and pinopode expression in stimulated cycles of oocyte donors. *Fertil. Steril.*, **71**, 1040–1047.
- Duggan, M.A., Brashert, P., Ostor, A., Scurry, J., Billson, V., Kneafsey, P. and Difrancesco, L. (2001) The accuracy and interobserver reproducibility of endometrial dating. *Pathology*, **3**, 292–297.
- Enders, A.C. and Nelson, D.M. (1973) Pinocytic activity of the uterus of the rat. *Am. J. Anat.*, **138**, 277–300.
- Ertzeid, G. and Storeng, R. (2001) The impact of ovarian stimulation on implantation and fetal development in mice. *Hum. Reprod.*, **16**, 221–225.
- Ezra, Y., Simon, A., Sherman, Y., Benshushan, A., Younis, J.S. and Laufer N. (1994) The effect of progesterone administration in the follicular phase of an artificial cycle on endometrial morphology: a model of premature luteinization. *Fertil. Steril.*, **62**, 108–112.
- Fanchin, R., de Ziegler, D., Castracare, V.D., Taieb, J., Olivennes, F. and Frydman, R. (1995) Physiopathology of premature progesterone elevation. *Fertil. Steril.*, **64**, 796–801.
- Fanchin, R., Peltier, E., Frydman, R. and de Ziegler, D. (2001) Human chorionic gonadotropin: does it affect human endometrial morphology in vivo? *Semin. Reprod. Med.*, **19**, 31–35.
- Forman, R.G., Eychenne, B., Nessmann, C., Frydman, R. and Robel, P. (1989) Assessing the early luteal phase in in vitro fertilization cycles: relationships between plasma steroids, endometrial receptors, and endometrial histology. *Fertil. Steril.*, **51**, 310–316.
- Garcia, J.E., Acosta, A.A., Hsiu, J.G. and Jones, H.W. Jr (1984) Advanced endometrial maturation after ovulation induction with human menopausal gonadotropin/human chorionic gonadotropin for in vitro fertilization. *Fertil. Steril.*, **41**, 31–35.
- Giess, R., Tanasescu, I., Steck, T. and Stedner, M. (1999) Leukemia inhibitory factor gene mutations in infertile women. *Mol. Hum. Reprod.*, **5**, 581–586.
- Hadi, F.H., Chantler, E., Anderson, E., Nicholson, R., McClelland, R.A. and Seif, M.W. (1994) Ovulation induction and endometrial steroid receptors. *Hum. Reprod.*, **9**, 2405–2410.
- Hambartsoumian, E. (1998) Endometrial leukemia inhibitory factor (LIF) as a possible cause of unexplained infertility and multiple failures of implantation. *Am. J. Reprod. Immunol.*, **2**, 137–143.
- Hambartsoumian, E., Taupin, J.L., Moreau, J.F., Frydman, R. and Chaouat, G. (1998) In-vivo administration of progesterone inhibits the secretion of endometrial leukaemia inhibitory factor in vitro. *Mol. Hum. Reprod.*, **11**, 1039–1044.
- Han, S.W., Lei, Z.M. and Rao, C.V. (1999) Treatment of human endometrial stromal cells with chorionic gonadotrophin promotes their morphological and functional differentiation into decidua. *Mol. Cell. Endocrinol.*, **147**, 7–16.
- Hii, L.L. and Rogers, P.A. (1998) Endometrial vascular and glandular expression of integrin alpha(v)beta3 in women with and without endometriosis. *Hum. Reprod.*, **13**, 1030–1035.
- Kim, J.W., Lee, Y.S., Kim, B.K., Park, D.C., Lee, J.M., Kim, I.K. and Namkoong, S.E. (1999) Cell cycle arrest in endometrial carcinoma cells exposed to gonadotropin-releasing hormone analog. *Gynecol. Oncol.*, **73**, 368–371.
- Kolb, B.A. and Paulson, R.J. (1997) The luteal phase of cycles utilizing controlled ovarian hyperstimulation and the possible impact of this hyperstimulation on embryo implantation. *Am. J. Obstet. Gynecol.*, **176**, 1262–1267.
- Kolibianakis, E., Bourgain, C., Albano, C., Osmanagaoglu, E., Smitz, J., Van Steirteghem, A. and Devroey, P. (2002) Effect of ovarian stimulation with recombinant follicle-stimulating hormone, gonadotropin releasing hormone antagonists, and human chorionic gonadotropin on endometrial maturation on the day of oocyte pick-up. *Fertil. Steril.*, **78**, 1025–1029.
- Kolibianakis, E.M., Albano, C., Kahn, J., Camus, M., Tournaye, H., Van Steirteghem, A.C. and Devroey, P. (2003a) Exposure to high levels of luteinizing hormone and estradiol in the early follicular phase of gonadotropin-releasing hormone antagonist cycles is associated with a reduced chance of pregnancy. *Fertil. Steril.*, **79**, 873–880.
- Kolibianakis, E., Bourgain, C., Platteau, P., Albano, C., Van Steirteghem, A. and Devroey, P. (2003b) Abnormal endometrial development occurs during the luteal phase in non-supplemented donor cycles treated with recombinant follicle stimulating hormone (rec-FSH) and gonadotropin releasing hormone (GnRH) antagonists. *Fertil. Steril.*, **80**, 464–466.
- Laird, S.M., Tuckerman, E.M., Dalton, C.F., Dunphy, B.C., Li, T.C. and Zhang, X. (1997) The production of leukaemia inhibitory factor by human endometrium: presence in uterine flushings and production by cells in culture. *Hum. Reprod.*, **3**, 569–574.
- Lass, A., Peat, D., Avery, S. and Brinsden, P. (1998) Histological evaluation of endometrium on the day of oocyte retrieval after gonadotrophin-releasing hormone agonist-follicle stimulating hormone ovulation induction for in vitro fertilization. *Hum. Reprod.*, **13**, 3203–3205.
- Lede-Bataille, N., Lapree-Delage, G., Taupin, J.L., Dubanchet, S., Frydman, R. and Chaouat, G. (2002) Concentration of leukaemia inhibitory factor (LIF) in uterine flushing fluid is highly predictive of embryo implantation. *Hum. Reprod.*, **1**, 213–218.
- Lecce, G., Meduri, G., Ancelin, M., Bergeron, C. and Perrot-Appianat, M. (2001) Presence of estrogen receptor  $\beta$  in the human endometrium through the cycle: expression in glandular, stromal and vascular cells. *J. Clin. Endocrinol. Metab.*, **86**, 1379–1386.
- Lessey, B.A. (2000) The role of the endometrium during embryo implantation. *Hum. Reprod.*, **15** (Suppl.), 39–50.
- Lessey, B.A., Ilesanmi, A.O., Lessey, M.A., Riben, M., Harris, J.E. and Chwalisz, K. (1996) Luminal and glandular endometrial epithelium express integrins differentially throughout the menstrual cycle: implications for implantation, contraception, and infertility. *Am. J. Reprod. Immunol.*, **35**, 195–204.
- Levi, A.J., Drews, M.R., Bergh, P.A., Miller, B.T. and Scott, R.T. Jr (2001) Controlled ovarian stimulation does not adversely affect endometrial receptivity in in vitro fertilization cycles. *Fertil. Steril.*, **76**, 670–674.
- Li, T.C., Rogers, A.W., Dockery, P., Lenton, E.A. and Cooke, I.D. (1988) A new method of histological dating of human endometrium in the luteal phase. *Fertil. Steril.*, **50**, 52–60.
- Macklon, N.S. and Fauser, B.C. (2000) Impact of ovarian hyperstimulation on the luteal phase. *J. Reprod. Fert.*, **55** (Suppl.), 101–108.
- Macrow, P.J., Li, T.C., Seif, M.W., Buckley, C.H. and Elstein M. (1994) Endometrial structure after superovulation: a prospective controlled study. *Fertil. Steril.*, **61**, 696–699.
- Marchini, M., Fedele, L., Bianchi, S., Losa, G.A., Ghisletta, M. and Gandiani, G.B. (1991) Secretory changes in preovulatory endometrium during controlled ovarian hyperstimulation with buserelin acetate and human gonadotropins. *Fertil. Steril.*, **55**, 717–721.
- Martel, D., Frydman, R., Glissant, M., Maggioni, C., Roche, D. and Psychoyos, A. (1987) Scanning electron microscopy of postovulatory human endometrium in spontaneous cycles and cycles stimulated by hormone treatment. *J. Endocrinol.*, **114**, 319–324.
- Meresman, G.F., Buquet, R.A., Bilotas, M., Baranao, R.I., Sueldo, C. and Tesone, M. (2002) Gonadotropin-releasing hormone agonist (GnRH-a) induces apoptosis and reduces cell proliferation in eutopic endometrial cultures from women with endometriosis (EDT). *Fertil. Steril.*, **77** (Suppl. 1), S43.
- Meyer, W.R., Novotny, D.B., Fritz, M.A., Beyler, S.A., Wolf, L.J. and Lessey, B.A. (1999) Effect of exogenous gonadotropins on endometrial maturation in oocyte donors. *Fertil. Steril.*, **71**, 109–114.
- Molina, R., Castila, J.A., Vergara, F., Perez, M., Garrido, F. and Herruzo, A.J. (1989) Luteal cytoplasmic estradiol and progesterone receptors in human

- endometrium: in vitro fertilization and normal cycles. *Fertil. Steril.*, **51**, 976–979.
- Mote, P.A., Johnston, J.F., Manninen, T., Tuohimaa, P. and Clarke, C.L. (2001) Detection of progesterone receptor forms A and B by immunohistochemical analysis. *J. Clin. Pathol.*, **54**, 624–630.
- Murphy, C.R. (2000) Understanding the apical surface markers of uterine receptivity. Pinopods or uterodomes? *Hum. Reprod.*, **15**, 2415–2454.
- Murray, M.J., Meyer, W.R., Lessey, B.A., Zaino, R.J., Novotny, D.B. and Fritz, M.A. (2002) Endometrial dating revisited: a randomized systematic study of secretory phase histological characteristics in normally cycling fertile women. *Fertil. Steril.*, **78** (Suppl. 1), S67.
- Navot, D., Scott, R.T., Droesch, K., Veeck, L.L., Liu, H.C. and Rosenwaks, Z. (1991) The window of embryo transfer and the efficiency of human conception in vitro. *Fertil. Steril.*, **55**, 114–118.
- Nikas, G., Develioglou, O.H., Toner, J.P. and Jones, H.W. Jr (1999) Endometrial pinopodes indicate a shift in the window of receptivity in IVF cycles. *Hum. Reprod.*, **14**, 787–792.
- Noci, I., Borri, P., Coccia, M.E., Criscuolo, L., Scarselli, G., Messeri, G., Paglierani, M., Moncini, D. and Taddei, G. (1997) Hormonal patterns, steroid receptors and morphological pictures of endometrium in hyperstimulated IVF cycles. *Eur. J. Obstet. Gynecol. Reprod. Biol.*, **75**, 215–220.
- Novotny, R., Malinsky, J., Oborna, I. and Dostal, J. (1999) Ultrastructure of endometrial surface relief in normal menstrual cycle and after hormonal stimulation. *Acta Univ. Palacki. Olomuc. Fac. Med.*, **142**, 47–55.
- Noyes, R.W., Hertig, A.J. and Rock, J. (1950) Dating the endometrial biopsy. *Fertil. Steril.*, **1**, 3–25.
- Nygren, K.G. and Andersen, A.N. (2001) Assisted reproductive technology in Europe, 1998. Results generated from European registers by ESHRE. European Society of Human Reproduction and Embryology. *Hum. Reprod.*, **16**, 2459–2471.
- Olivennes, F., Ledee-Bataille, N., Samama, M., Kadoch, J., Taupin, J.L., Dubanchet, S., Chaouat, G. and Frydman, R. (2003) Assessment of leukemia inhibitory factor levels by uterine flushing at the time of egg retrieval does not adversely affect pregnancy rates with in vitro fertilization. *Fertil. Steril.*, **79**, 900–904.
- Pritts, E.A. and Atwood, A.K. (2002) Luteal phase support in infertility treatment: a meta-analysis of the randomized trials. *Hum. Reprod.*, **17**, 2287–2299.
- Ragni, G., Piloni, S., Rossi, P., Carinelli, S., De Lauretis, L., Vegetti, W. and Crosignani, P.G. (1999) Endometrial morphology and ultrasound vascular findings. A randomized trial after intramuscular and vaginal progesterone supplementation in IVF. *Gynecol. Obstet. Invest.*, **47**, 151–156.
- Rogers, P.A., Milne, B.J. and Trounson, A.O. (1986) A model to show human uterine receptivity and embryo viability following ovarian stimulation for in vitro fertilization. *J. In Vitro Fertil. Embryo Transfer*, **3**, 93–8.
- Rogers, P.A., Polson, D., Murphy, C.R., Hosie, M., Susil, B. and Leoni, M. (1991) Correlation of endometrial histology, morphometry, and ultrasound appearance after different stimulation protocols for in vitro fertilization. *Fertil. Steril.*, **55**, 583–587.
- Salat-Baroux, J., Romain, S., Alvarez, S., Antoine, J.M., Kopp, K., Raulais, D., de Brux, J. and Martin, P.M. (1994) Biochemical and immunohistochemical multiparametric analysis of steroidreceptors and growth factor receptors in human normal endometrium in spontaneous cycles and after the induction of ovulation. *Hum. Reprod.*, **9**, 200–208.
- Seif, M.W., Pearson, J.M., Ibrahim, Z.H., Buckley, C.H., Aplin, J.D., Buck, P., Matson, P.L. and Lieberman, B.A. (1992) Endometrium in in-vitro fertilization cycles: morphological and functional differentiation in the implantation phase. *Hum. Reprod.*, **7**, 6–11.
- Seppala, M. and Tiitinen, A. (1995) Endometrial responses to corpus luteum products in cycles with induced ovulation: theoretical and practical considerations. *Hum. Reprod. (Suppl. 2)*, 67–76.
- Smith, S., Hosid, S. and Scott, L. (1995) Endometrial biopsy dating. Interobserver variation and its impact on clinical practice. *J. Reprod. Med.*, **40**, 1–3.
- Stavreus-Evers, A., Nikas, G., Sahlin, L., Eriksson, H. and Landgren, B.M. (2001) Formation of pinopodes in human endometrium is associated with the concentrations of progesterone and progesterone receptors. *Fertil. Steril.*, **76**, 782–791.
- Sterzik, K., Dallenbach, C., Schneider, V., Sasse, V. and Dallenbach-Hellweg, G. (1988) In vitro fertilization: the degree of endometrial insufficiency varies with the type of ovarian stimulation. *Fertil. Steril.*, **50**, 457–462.
- Stewart, C.L., Kaspar, P., Brunet, L.J., Bhatt, H., Gadi, I., Kontgen, F. and Abbondanzo, S.J. (1992) Blastocyst implantation depends on maternal expression of leukaemia inhibitory factor. *Nature*, **359**, 76–79.
- Tang, B. and Gurpide, E. (1993) Direct effects of gonadotrophins on decidualization of human endometrial stromal cells. *J. Steroid Biochem. Mol. Biol.*, **47**, 115–121.
- Tavaniotou, A., Smits, J., Bourgain, C. and Devroey, P. (2001) Ovulation induction disrupts luteal phase function. *Ann. NY Acad. Sci.*, **943**, 55–63.
- Tavaniotou, A., Bourgain, C., Albano, C., Platteau, P., Smits, J. and Devroey, P. (2003) Endometrial integrin expression in the early luteal phase in natural and stimulated cycles for in vitro fertilization. *Eur. J. Obstet. Gynecol. Reprod. Biol.*, **108**, 67–71.
- Thomas, K., Thomson, A.J., Sephton, V., Cowan, C., Wood, S., Vince, G., Kingsland C.R. and Lewis-Jones, D.I. (2002) The effect of gonadotrophic stimulation on integrin expression in the endometrium. *Hum. Reprod.*, **17**, 63–68.
- Toner, J.P., Hassiakos, D.K., Muasher, S.J., Hsiu, J.G. and Jones, H.W. Jr (1991) Endometrial receptivities after leuprolide suppression and gonadotropin stimulation: histology, steroid receptor concentrations, and implantation rates. *Ann. NY Acad. Sci.*, **622**, 220–229.
- Tsai, H.D., Chang, C.C., Hsieh, Y.Y. and Lo, H.Y. (2000) Leukemia inhibitory factor expression in different endometrial locations between fertile and infertile women throughout different menstrual phases. *J. Assist. Reprod. Genet.*, **17**, 415–418.
- Ubbaldi, F., Bourgain, C., Tournaye, H., Smits, J., Van Steirteghem, A. and Devroey, P. (1997) Endometrial evaluation by aspiration biopsy on the day of oocyte retrieval in the embryo transfer cycles in patients with serum progesterone rise during the follicular phase. *Fertil. Steril.*, **67**, 521–526.
- Wang, Y., Chen, Y. and Li, M. (2000) Effects of ovulation induction therapies on endometrial integrin alpha v beta 3 expression in patients with polycystic ovarian syndrome related infertility. *Zhonghua Fu Chan Ke Za Zhi.*, **35**, 163–165.
- Wilcox, A.J., Baird, D.D. and Weinberg, C.R. (1999) Time of implantation of the conceptus and loss of pregnancy. *N. Engl. J. Med.*, **340**, 1796–1799.
